# Supplementary material
Source: PubMed Central journal article supplement (PMC1885622)
Supplement: pnas_0610552104_1.pdf [file pnas_0610552104_1.pdf]

**Supplemental Table S-1: GPS Coordinates of Sampling Sites**

| <b>Site ID</b> | <b>latitude</b> | <b>longitude</b> | <b>sample site description</b> |
|----------------|-----------------|------------------|--------------------------------|
| A1             | 30.0249         | -90.1228         | Lake Pontchartrain             |
| A2             | 30.0247         | -90.1336         | Lake Pontchartrain             |
| A3             | 30.0295         | -90.1542         | Lake Pontchartrain             |
| A4             | 30.0329         | -90.1743         | Lake Pontchartrain             |
| B1             | 30.0264         | -90.1210         | Lake Pontchartrain             |
| B2             | 30.0355         | -90.1209         | Lake Pontchartrain             |
| B3             | 30.0543         | -90.1210         | Lake Pontchartrain             |
| B4             | 30.0719         | -90.1209         | Lake Pontchartrain             |
| C1             | 30.0280         | -90.1128         | Lake Pontchartrain             |
| C2             | 30.0319         | -90.1038         | Lake Pontchartrain             |
| C3             | 30.0410         | -90.0857         | Lake Pontchartrain             |
| C4             | 30.0500         | -90.0681         | Lake Pontchartrain             |
| CS             | 30.0688         | -90.1636         | Lake Pontchartrain             |
| D1             | 30.0323         | -90.0771         | Lake Pontchartrain             |
| D2             | 30.0321         | -90.0745         | Lake Pontchartrain             |
| D3             | 30.0412         | -90.0753         | Lake Pontchartrain             |
| D4             | 30.0592         | -90.0766         | Lake Pontchartrain             |
| E1             | 30.0340         | -90.0377         | Lake Pontchartrain             |
| E2             | 30.0334         | -90.0352         | Lake Pontchartrain             |
| E3             | 30.0422         | -90.0374         | Lake Pontchartrain             |
| E4             | 30.0600         | -90.0413         | Lake Pontchartrain             |
| R1             | 30.0255         | -90.1203         | Industrial Canal               |
| R2             | 30.0257         | -90.0829         | Bayou St. John                 |
| R3             | 30.0296         | -90.0741         | London Ave. Canal              |
| R4             | 30.0316         | -90.0380         | Industrial Canal               |
| R5             | 30.0115         | -90.0701         | London Ave. Canal              |
| R6             | 30.0119         | -90.0860         | Bayou St. John                 |
| S1             | 29.9868         | -90.1251         | 17th Street Canal              |
| S3             | 30.0250         | -90.0316         | Industrial Canal               |
| Y1             | 30.0183         | -90.0611         | Flooded sediment               |
| Y2             | 30.0151         | -90.0694         | Flooded sediment               |
| Y3             | 30.0236         | -90.0204         | Flooded sediment               |
| Y4             | 30.0089         | -90.1151         | Flooded sediment               |
| Y5             | 30.0158         | -90.1025         | Flooded sediment               |
| Y6             | 30.0338         | -89.9635         | Flooded sediment               |
| Y7             | 30.0568         | -89.9459         | Flooded sediment               |
| Y8             | 29.9905         | -90.0475         | Flooded sediment               |
| Y9             | 29.9724         | -90.0181         | Flooded sediment               |
| Y10            | 29.9640         | -89.9872         | Flooded sediment               |
| Y11            | 29.9477         | -90.1041         | Flooded sediment               |
| Z1             | 29.9572         | -90.0630         | non-flooded sediment           |
| Z2             | 29.9360         | -90.0741         | non-flooded sediment           |
| Z3             | 29.9233         | -90.0923         | non-flooded sediment           |
| Z4             | 29.9259         | -90.1276         | non-flooded sediment           |
| Z5             | 29.9911         | -90.1301         | non-flooded sediment           |
| Z6             | 29.9547         | -90.1661         | non-flooded sediment           |
| Z7             | 29.9988         | -90.2139         | non-flooded sediment           |
| Z8             | 29.9893         | -90.1718         | non-flooded sediment           |
| Z9             | 30.0044         | -90.1406         | non-flooded sediment           |
| Z10            | 30.0127         | -90.0098         | non-flooded sediment           |
