# Supplementary material
Source: PubMed Central journal article supplement (PMC1885622)
Supplement: pnas_0610552104_2.pdf [file pnas_0610552104_2.pdf]

**Supplemental Table S-2: Abundance of fecal indicators and total *Vibrio* and presence of *Bacteroidales*, *Bifidobacterium*, and *Legionella* spp. in Lake Pontchartrain waters.** Units for enumerated samples include colony-forming units (CFU) for samples analyzed by membrane filtration and CFU equivalents for samples enumerated using qPCR. Samples enumerated using chromogenic substrate and coliphage culture method correspond to most probable numbers (MPN). *Bacteroidales*, *Bifidobacterium*, and *Legionella* spp. are reported as detected (+) or not detected (neg). “na” indicates no sample analyzed for corresponding microbe.

**Table on following page.**

| Lake Sample Sites →                   |              | Transect # 1 –<br>Number/100mL |     |     |     | Transect # 2 -<br>Number/100mL |     |     |      | Lake Transect #3 –<br>Number/100mL |     |     |     |
|---------------------------------------|--------------|--------------------------------|-----|-----|-----|--------------------------------|-----|-----|------|------------------------------------|-----|-----|-----|
| Assay                                 | Date         | A1                             | A2  | A3  | A4  | B1                             | B2  | B3  | B4   | C1                                 | C2  | C3  | C4  |
| <b>Enterococci</b>                    |              |                                |     |     |     |                                |     |     |      |                                    |     |     |     |
| qPCR                                  | 11 Oct. 2005 | 21                             | <5  | <5  | <5  | 14                             | <5  | <5  | <5   | 6                                  | <5  | <5  | 9   |
| MF <sup>a</sup>                       | 11 Oct. 2005 | 8                              | <1  | 1   | <1  | 28                             | 2   | <1  | 1.5  | 2                                  | <1  | <1  | 1   |
| CS <sup>b</sup>                       | 25 Oct. 2005 | 244                            | 25  | 10  | <1  | 340                            | 20  | 26  | 5    | 80                                 | 10  | 5   | 5   |
| qPCR                                  | 25 Oct. 2005 | 113                            | 29  | <5  | <5  | 291                            | 34  | 5   | <5   | 61                                 | <5  | <5  | <5  |
| MF                                    | 25 Oct. 2005 | 38                             | 1   | 1   | 5   | 37                             | 3   | 1   | 2    | 12                                 | 6   | 4   | 3   |
| CS                                    | 8 Nov. 2005  | 50                             | 21  | <1  | 5   | 60                             | 5   | 5   | 1    | 31                                 | 10  | <1  | 5   |
| qPCR                                  | 8 Nov. 2005  | 36                             | 11  | <5  | <5  | 105                            | 8   | <5  | <5   | 19                                 | <5  | <5  | <5  |
| MF                                    | 8 Nov. 2005  | 12                             | 4   | 3   | 10  | 50                             | 3   | 1   | 1    | 13                                 | 19  | 1   | <1  |
| <b><i>E. coli</i></b>                 |              |                                |     |     |     |                                |     |     |      |                                    |     |     |     |
| qPCR                                  | 25 Oct. 2005 | 297                            | 30  | 18  | neg | 120                            | 57  | <5  | 10.5 | 12                                 | 37  | <5  | 21  |
| MF                                    | 25 Oct. 2005 | 150                            | 10  | <1  | <1  | 200                            | 15  | <1  | 10   | 20                                 | 50  | 35  | 15  |
| qPCR                                  | 8 Nov. 2005  | 227                            | 75  | 59  | 50  | 71                             | <5  | 13  | <5   | 159                                | 77  | 39  | 16  |
| MF                                    | 23 Nov. 2005 | 70                             | <1  | 5   | 2   | 95                             | 13  | 7   | 10   | 28                                 | 4   | 4   | 3   |
| <b>FRNA coliphages</b>                |              |                                |     |     |     |                                |     |     |      |                                    |     |     |     |
| culture                               | 25 Oct. 2005 | <1                             | <1  | <1  | <1  | <1                             | <1  | <1  | <1   | <1                                 | <1  | <1  | <1  |
| culture                               | 8 Nov. 2005  | <1                             | <1  | <1  | <1  | <1                             | <1  | <1  | <1   | <1                                 | <1  | <1  | <1  |
| <b><i>Clostridium perfringens</i></b> |              |                                |     |     |     |                                |     |     |      |                                    |     |     |     |
| culture                               | 25 Oct. 2005 | 16                             | 4   | 4   | <4  | <4                             | <4  | <4  | <4   | <4                                 | <4  | <4  | <4  |
| culture                               | 8 Nov. 2005  | na                             | <4  | <4  | <4  | <4                             | <4  | <4  | <4   | <4                                 | <4  | <4  | <4  |
| culture                               | 12 Dec. 2005 | 40                             | 34  | <4  | <4  | 4                              | <4  | <4  | <4   | <4                                 | <4  | <4  | <4  |
| culture                               | 27 Jan. 2006 | <4                             | 4   | <4  | 4   | 4                              | 8   | <4  | <4   | <4                                 | <4  | <4  | <4  |
| <b>Bacteroidales</b>                  |              |                                |     |     |     |                                |     |     |      |                                    |     |     |     |
| TNA <sup>c</sup>                      | 25 Oct. 2005 | neg                            | neg | neg | neg | neg                            | neg | neg | neg  | neg                                | neg | neg | neg |
| PCR                                   | 25 Oct. 2005 | +                              | +   | neg | neg | +                              | +   | neg | neg  | +                                  | +   | neg | neg |
| TNA                                   | 8 Nov. 2005  | neg                            | neg | neg | neg | neg                            | neg | neg | neg  | neg                                | neg | neg | neg |
| PCR                                   | 8 Nov. 2005  | +                              | +   | neg | neg | +                              | +   | neg | neg  | +                                  | +   | neg | neg |
| <b><i>Bifidobacterium</i></b>         |              |                                |     |     |     |                                |     |     |      |                                    |     |     |     |
| PCR                                   | 25 Oct. 2005 | +                              | +   | neg | neg | +                              | +   | neg | neg  | +                                  | neg | neg | neg |
| PCR                                   | 8 Nov. 2005  | +                              | +   | neg | neg | +                              | +   | neg | neg  | neg                                | neg | neg | neg |
| <b>Total Vibrio</b>                   |              |                                |     |     |     |                                |     |     |      |                                    |     |     |     |
| MF                                    | 11 Oct. 2005 | 2690                           | 532 | 524 | 352 | 2350                           | 776 | 148 | 128  | 756                                | 532 | 612 | 196 |
| MF                                    | 27 Jan. 2006 | 676                            | na  | na  | na  | 412                            | 408 | 36  | na   | na                                 | na  | na  | na  |
| <b><i>Legionella</i></b>              |              |                                |     |     |     |                                |     |     |      |                                    |     |     |     |
| genus PCR                             | 11 Oct. 2005 | +                              | +   | +   | +   | +                              | +   | +   | neg  | +                                  | +   | +   | +   |
| <i>mip</i> PCR                        | 11 Oct. 2005 | neg                            | neg | neg | neg | neg                            | neg | neg | neg  | neg                                | neg | neg | neg |
| genus PCR                             | 25 Oct. 2005 | +                              | +   | neg | +   | +                              | +   | +   | +    | +                                  | +   | +   | neg |
| <i>mip</i> PCR                        | 25 Oct. 2005 | neg                            | neg | neg | neg | neg                            | neg | neg | neg  | neg                                | neg | neg | neg |
| genus PCR                             | 8 Nov. 2005  | +                              | neg | neg | +   | neg                            | +   | +   | +    | neg                                | neg | neg | neg |
| <i>mip</i> PCR                        | 8 Nov. 2005  | neg                            | neg | neg | neg | neg                            | neg | neg | neg  | neg                                | neg | neg | neg |
| genus PCR                             | 12 Dec. 2005 | na                             | na  | na  | na  | +                              | +   | neg | +    | na                                 | na  | na  | na  |
| <i>mip</i> PCR                        | 12 Dec. 2005 | na                             | na  | na  | na  | neg                            | +   | neg | neg  | na                                 | na  | na  | na  |
| genus PCR                             | 27 Jan. 2006 | na                             | na  | na  | na  | +                              | neg | neg | +    | na                                 | na  | na  | na  |
| <i>mip</i> PCR                        | 27 Jan. 2006 | na                             | na  | na  | na  | neg                            | neg | neg | neg  | na                                 | na  | na  | na  |
| genus PCR                             | 29 Mar. 2006 | na                             | na  | na  | na  | +                              | +   | +   | +    | na                                 | na  | na  | na  |
| <i>mip</i> PCR                        | 29 Mar. 2006 | na                             | na  | na  | na  | neg                            | neg | neg | neg  | na                                 | na  | na  | na  |

<sup>a</sup>MF = membrane filtration; <sup>b</sup>CS = chromogenic substrate; <sup>c</sup>TNA = *Taq* nuclease assay
