# Supplementary material
Source: PubMed Central journal article supplement (PMC1885622)
Supplement: pnas_0610552104_3.pdf [file pnas_0610552104_3.pdf]

**Supplemental Table S-3: Abundance of fecal indicators and total *Vibrio* and presence of *Bacteroidales*, *Bifidobacterium*, and *Legionella* spp. in Canal waters.**

Units for enumerated samples include colony-forming units (CFU) for samples analyzed by plate counts and CFU equivalents for samples enumerated by qPCR. Samples enumerated using chromogenic substrate and coliphage culture method correspond to most probable numbers (MPN). *Bacteroidales*, *Bifidobacterium*, and *Legionella* spp. are reported as detected (+) or not detected (neg). “na” indicates no sample analyzed for corresponding microbe.

**Table on following page.**

**Panel A: Water from New Orleans Canals Discharging into Lake Pontchartrain - CFU/100mL**

| Site/<br>Indicator                    | Assay            | Date →          |                 |                 |                | 12 Nov. 2005      |                  |
|---------------------------------------|------------------|-----------------|-----------------|-----------------|----------------|-------------------|------------------|
|                                       |                  | 11 Oct.<br>2005 | 19 Oct.<br>2005 | 24 Oct.<br>2005 | 2 Nov.<br>2005 | Before<br>Pumping | After<br>pumping |
| <b>Enterococci</b>                    |                  |                 |                 |                 |                |                   |                  |
| 17 <sup>th</sup> Street Canal (S1)    | CS <sup>a</sup>  | na              | 266             | 107             | 63             | 115               | 442              |
|                                       | qPCR             | 185             | 537             | 217             | 127            | 139               | 1480             |
|                                       | MF <sup>b</sup>  | 255             | 202             | 93              | 115            | 26                | 2150             |
| Industrial Canal (S3)                 | CS               | na              | 15              | 15              | 5              | 15                | na               |
|                                       | qPCR             | 16              | <5              | 5.7             | <5             | 12                | na               |
|                                       | MF               | 24              | 2               | 6               | 2              | 4                 | na               |
| <b><i>E. coli</i></b>                 |                  |                 |                 |                 |                |                   |                  |
| 17 <sup>th</sup> Street Canal (S1)    | qPCR             | 1,760           | 2,700           | 2,000           | 3,110          | 383               | 3,570            |
|                                       | MF               | 6,000           | 11,700          | 13,000          | 3,600          | 300               | 7,500            |
| Industrial Canal (S3)                 | qPCR             | 85              | 176             | 623             | 418            | 10                | na               |
|                                       | MF               | 30              | 46              | 10              | 20             | 10                | na               |
| <b>FRNA coliphages</b>                |                  |                 |                 |                 |                |                   |                  |
| 17 <sup>th</sup> Street Canal (S1)    | culture          | na              | na              | 8               | na             | na                | na               |
| Industrial Canal (S3)                 | culture          | na              | na              | <1              | na             | na                | na               |
| <b><i>Clostridium perfringens</i></b> |                  |                 |                 |                 |                |                   |                  |
| 17 <sup>th</sup> Street Canal (S1)    | culture          | na              | na              | 88              | <4             | na                | na               |
| Industrial Canal (S3)                 | culture          | na              | na              | <4              | <4             | na                | na               |
| <b>Bacteroidales</b>                  |                  |                 |                 |                 |                |                   |                  |
| 17 <sup>th</sup> Street Canal (S1)    | TNA <sup>c</sup> | neg             | neg             | neg             | neg            | neg               | neg              |
|                                       | PCR              | +               | na              | +               | na             | na                | na               |
| Industrial Canal (S3)                 | TNA              | neg             | neg             | neg             | neg            | neg               | neg              |
|                                       | PCR              | +               | na              | neg             | na             | na                | na               |
| <b><i>Bifidobacterium</i></b>         |                  |                 |                 |                 |                |                   |                  |
| 17 <sup>th</sup> Street Canal (S1)    | PCR              | na              | +               | +               | +              | +                 | +                |
| Industrial Canal (S3)                 | PCR              | na              | +               | +               | +              | +                 | na               |
| <b>Total <i>Vibrio</i></b>            |                  |                 |                 |                 |                |                   |                  |
| 17 <sup>th</sup> Street Canal (S1)    | MF               | 5,580           | na              | na              | na             | na                | na               |
| Industrial Canal (S3)                 | MF               | 1,780           | na              | na              | na             | na                | na               |
| <b><i>Legionella</i> spp.</b>         |                  |                 |                 |                 |                |                   |                  |
| 17 <sup>th</sup> Street Canal (S1)    | Genus PCR        | +               | +               | +               | +              | na                | na               |
| Industrial Canal (S3)                 | Genus PCR        | +               | +               | neg             | +              | na                | na               |
| <b><i>L. pneumophila</i></b>          |                  |                 |                 |                 |                |                   |                  |
| 17 <sup>th</sup> Street Canal (S1)    | <i>mip</i> gene  | neg             | neg             | neg             | neg            | na                | na               |
| Industrial Canal (S3)                 | <i>mip</i> gene  | neg             | neg             | neg             | neg            | na                | na               |

**Panel B: Water from New Orleans Canal Shoreline – CFU/100mL**

| Site ID                | 12 Nov. 2005 – Indicator & Assay – CFU/100mL |                      |                          |                               |
|------------------------|----------------------------------------------|----------------------|--------------------------|-------------------------------|
|                        | Enterococci,<br>CS                           | Enterococci,<br>qPCR | <i>E. coli</i> ,<br>qPCR | <i>Bifidobacterium</i><br>PCR |
| Industrial Canal (R1)  | 42                                           | 17                   | 350                      | +                             |
| Bayou St. John (R2)    | 387                                          | 345                  | 9,610                    | neg                           |
| London Ave. Canal (R3) | 282                                          | 30                   | 730                      | +                             |
| Industrial Canal (R4)  | 158                                          | 15                   | 50                       | neg                           |
| London Ave. Canal (R5) | 193                                          | 208                  | 332                      | +                             |
| Bayou St. John (R6)    | 152                                          | 53                   | 130                      | +                             |

<sup>a</sup>CS = chromogenic substrate; <sup>b</sup>MF = membrane filtration; <sup>c</sup>TNA = *Taq* nuclease assay
