# Supplementary material
Source: PubMed Central journal article supplement (PMC1885622)
Supplement: pnas_0610552104_4.pdf [file pnas_0610552104_4.pdf]

**Supplemental Table S-4: Vibrio abundance and percentage of pathogenic Vibrio isolates.** Total colony counts on TCBS medium (CFU per 100 ml) and % of all purified isolates from either TCBS or CHROMagar® Vibrio media identified as *V. cholerae*, *V. vulnificus*, and *V. parahaemolyticus*, or other species for water samples collected from Lake Pontchartrain and from the 17<sup>th</sup> Street and Industrial Canals.

| Panel A: 11 Oct 2005           |                           |                       |                       |                      |                            |       |
|--------------------------------|---------------------------|-----------------------|-----------------------|----------------------|----------------------------|-------|
| Station                        | Total Vibrio<br>CFU/100mL | Number of<br>Isolates | Positive Isolates (%) |                      |                            |       |
|                                |                           |                       | <i>V. cholerae</i>    | <i>V. vulnificus</i> | <i>V. parahaemolyticus</i> | Other |
| Lake, A1                       | 2690                      | 23                    | 30                    | 39                   | 4                          | 26    |
| Lake, A2                       | 532                       | 11                    | 18                    | 55                   | 0                          | 27    |
| Lake, A3                       | 524                       | 13                    | 8                     | 62                   | 0                          | 31    |
| Lake, A4                       | 352                       | 25                    | 16                    | 36                   | 4                          | 44    |
| Lake, B1                       | 2350                      | 15                    | 13                    | 60                   | 7                          | 20    |
| Lake, B2                       | 776                       | 19                    | 5                     | 74                   | 0                          | 21    |
| Lake, B3                       | 148                       | 11                    | 36                    | 27                   | 9                          | 27    |
| Lake, B4                       | 128                       | 42                    | 24                    | 24                   | 0                          | 52    |
| Lake, C1                       | 756                       | 7                     | 29                    | 57                   | 0                          | 14    |
| Lake, C2                       | 532                       | 13                    | 23                    | 54                   | 0                          | 23    |
| Lake, C3                       | 612                       | 5                     | 0                     | 40                   | 0                          | 60    |
| Lake, C4                       | 196                       | 22                    | 5                     | 41                   | 0                          | 55    |
| 17 <sup>th</sup> St. Canal, S1 | 5580                      | 29                    | 79                    | 3                    | 0                          | 17    |
| Industrial Canal, S3           | 1780                      | 29                    | 10                    | 72                   | 3                          | 14    |
| Average                        | 1150                      | 19                    | 21                    | 46                   | 1.8                        | 31    |

| Panel B: 27 Jan 2006           |                           |                       |                       |                      |                            |       |
|--------------------------------|---------------------------|-----------------------|-----------------------|----------------------|----------------------------|-------|
| Station                        | Total Vibrio<br>CFU/100mL | Number of<br>Isolates | Positive Isolates (%) |                      |                            |       |
|                                |                           |                       | <i>V. cholerae</i>    | <i>V. vulnificus</i> | <i>V. parahaemolyticus</i> | Other |
| Lake, A1                       | 676                       | 19                    | 0                     | 0                    | 0                          | 100   |
| Lake, B1                       | 412                       | 13                    | 0                     | 0                    | 0                          | 100   |
| Lake, B2                       | 408                       | 11                    | 0                     | 0                    | 0                          | 100   |
| Lake, B3                       | 36                        | 12                    | 8                     | 0                    | 0                          | 92    |
| Lake, D1                       | 472                       | 12                    | 0                     | 0                    | 0                          | 100   |
| Lake, D2                       | 596                       | 15                    | 0                     | 0                    | 0                          | 100   |
| Lake, D3                       | 44                        | 12                    | 0                     | 0                    | 17                         | 83    |
| Lake, D4                       | 32                        | 12                    | 8                     | 0                    | 0                          | 92    |
| Lake, E1                       | 332                       | 13                    | 0                     | 0                    | 0                          | 100   |
| Lake, E2                       | 268                       | 14                    | 0                     | 0                    | 0                          | 100   |
| Lake, E3                       | 172                       | 12                    | 0                     | 0                    | 0                          | 100   |
| Lake, E4                       | 60                        | 12                    | 0                     | 0                    | 0                          | 100   |
| 17 <sup>th</sup> St. Canal, S1 | 288                       | 32                    | 0                     | 0                    | 0                          | 100   |
| Industrial Canal, S3           | 664                       | 19                    | 11                    | 0                    | 0                          | 89    |
| Average                        | 298                       | 14                    | 1.8                   | 0                    | 1.1                        | 97    |
