# Supplementary material
Source: PubMed Central journal article supplement (PMC1885622)
Supplement: pnas_0610552104_5.pdf [file pnas_0610552104_5.pdf]

**Supplemental Table S-5: Abundance of Fecal Indicators in Shoreline Sediments of Lake Pontchartrain and New Orleans Canals, and in flooded and non-flooded residential sediments of the New Orleans area.** All samples were enumerated as number per gram of dry sediment, except for *Bifidobacterium* which was reported as detected (+) or not detected (-). Results from % organic analysis of the sediments provided for reference.

| Site ID <sup>b</sup> | 12 Nov 05                   |                          |                 |           | 25 Mar 06   |                        |           | 20 Jun 06   |
|----------------------|-----------------------------|--------------------------|-----------------|-----------|-------------|------------------------|-----------|-------------|
|                      | <i>E. coli</i> <sup>a</sup> | enterococci <sup>a</sup> |                 | % organic | enterococci | <i>Bifidobacterium</i> | % organic | enterococci |
|                      | qPCR                        | qPCR                     | CS <sup>c</sup> |           | CS          |                        |           | CS          |
| R1                   | 39                          | 26                       | 25              | 7.3       | 20          | +                      | 1.9       | 27          |
| R2                   | 774                         | 969                      | 134             | 4.8       | 132         | +                      | 3.1       | 207         |
| R3                   | 69                          | 200                      | 489             | 5.6       | 166         | +                      | 7.1       | 316         |
| R4                   | 0.7                         | 4                        | 10              | 0.2       | 15          | -                      | 0.2       | 8           |
| R5                   | 167                         | 870                      | 467             | 4.6       | 240         | +                      | 7.3       | 680         |
| R6                   | 102                         | 300                      | 194             | 2.8       | 581         | +                      | 12        | 237         |
| Y1                   | 471                         | 468                      |                 | 12.9      | 360         | +                      | 13        | 224         |
| Y2                   | 271                         | 666                      |                 | 10.1      | 240         | +                      | 7.8       | 1,860       |
| Y3                   | 975                         | 585                      |                 | 13.6      | 1,040       | +                      | 12        | 303         |
| Y4                   |                             |                          |                 |           |             |                        |           | 57          |
| Y5                   |                             |                          |                 |           |             |                        |           | 518         |
| Y6                   |                             |                          |                 |           |             |                        |           | 7           |
| Y7                   |                             |                          |                 |           |             |                        |           | 6,220       |
| Y8                   |                             |                          |                 |           |             |                        |           | 139         |
| Y9                   |                             |                          |                 |           |             |                        |           | 5           |
| Y10                  |                             |                          |                 |           |             |                        |           | 162         |
| Y11                  |                             |                          |                 |           |             |                        |           | 274         |
| Z1                   |                             |                          |                 |           |             |                        |           | 835         |
| Z2                   |                             |                          |                 |           |             |                        |           | 18          |
| Z3                   |                             |                          |                 |           |             |                        |           | 154         |
| Z4                   |                             |                          |                 |           |             |                        |           | 391         |
| Z5                   |                             |                          |                 |           |             |                        |           | 1           |
| Z6                   |                             |                          |                 |           |             |                        |           | 7,590       |
| Z7                   |                             |                          |                 |           |             |                        |           | 28          |
| Z8                   |                             |                          |                 |           |             |                        |           | 378         |
| Z9                   |                             |                          |                 |           |             |                        |           | 130         |
| Z10                  |                             |                          |                 |           |             |                        |           | 19          |

<sup>a</sup>Units for *E. coli* and enterococci by qPCR are in CFU equivalents per g dry sediment. Enterococci by CS in units of MPN per gram of dry sediment

<sup>b</sup>Sample types include shoreline sediment for samples which include an “R” in the name, flooded residential soils correspond to “Y”, and non-flooded residential soils correspond to “Z”.

<sup>c</sup>CS = chromogenic substrate
